# Supplementary material for: Bio-TDS: bioscience query tool discovery system
Source: PubMed Central journal article supplement — Nucleic Acids Res. 2016 Oct 18;45(Database issue):D1117–22. doi: 10.1093/nar/gkw940 (PMC5210639; doi:10.1093/nar/gkw940), 2016-10-18
Supplement: gkw940_supplemental_files.pdf [file gkw940_supplemental_files.pdf]

# Bio-TDS: Bioscience Query Tool Discovery System

Etienne Z. Gnimpieba<sup>1,2</sup>, Menno S. VanDiermen<sup>1</sup>, Shayla M. Gustafson<sup>1</sup>, Bill Conn<sup>1</sup>, Carol M. Lushbough<sup>1,2</sup>

<sup>1</sup>Biomedical Engineering Department, University of South Dakota, 4800 North Career Ave, Sioux Falls, SD 57107,

<sup>2</sup>BioSNTR, Brookings, SD 57006, USA

To whom correspondence should be addressed: +1 605 2749578; Etienne.Gnimpieba@usd.edu

## SUPPORTING MATERIALS

The **Bio-TDS (BioQuery Tools Discovery Systems)** has been developed to assist researchers in retrieving the most applicable analytic tools by allowing them to formulate their questions as free text. The Bio-TDS is a flexible retrieval system that affords users from multiple bioscience domains ( e.g. genomic, proteomic, bio-imaging) the ability to query over 15,000 analytic tool descriptions integrated from well-established, community repositories. One of the primary components of the Bio-TDS system is the ontology and natural language processing workflow for annotation, curation, query processing, and evaluation. The Bio-TDS's scientific impact was evaluated using sample questions posed by researchers retrieved from Biostars, a site focusing on biological data analysis. The Bio-TDS was compared to five similar bioscience analytic tool retrieval systems with the Bio-TDS outperforming the others in terms of relevance and completeness. The Bio-TDS offers researchers the capacity to associate their bioscience question with the most relevant computational toolsets required for the data analysis in their knowledge discovery process.

Table 2: Support Material Overview (also available at <http://biotds.org/help/supporting.xhtml>)

|    |                                                                           |
|----|---------------------------------------------------------------------------|
| S1 | <a href="#">BETS specification description and manipulation</a>           |
| S2 | <a href="#">Resources extraction and semi-automatics curation</a>         |
| S3 | <a href="#">TONER: Tools ontology-based annotation</a>                    |
| S4 | <a href="#">Bio-TDS Query processing workflow and programmatic access</a> |
| S5 | <a href="#">Bio-TDS evaluation and comparison</a>                         |

# S1 - BETS Specification description and manipulation

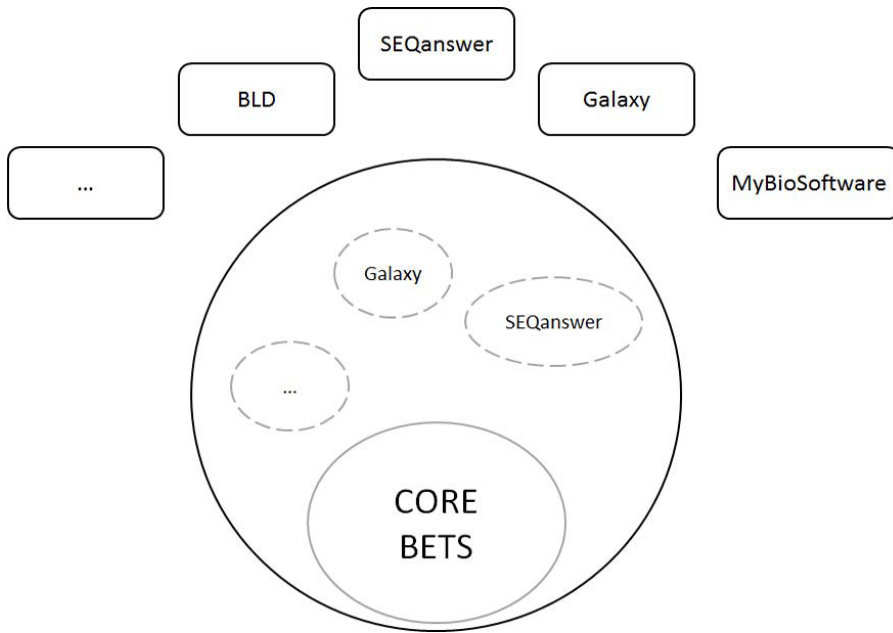

Figure S1a: BETS design Overview

**Bioinformatics Elaborated Tools Specifications (BETS)** provides a standard for analytic tool descriptions. The analytic tool descriptions (i.e. metadata) gathered from community tool repositories integrated into the Bio-TDS are stored in JSON format using the BETS standard. This standard consists of core BETS attributes and domains/repositories specific attributes (Figure S1a). The core BETS attributes are manually mapped to the repository attribute.

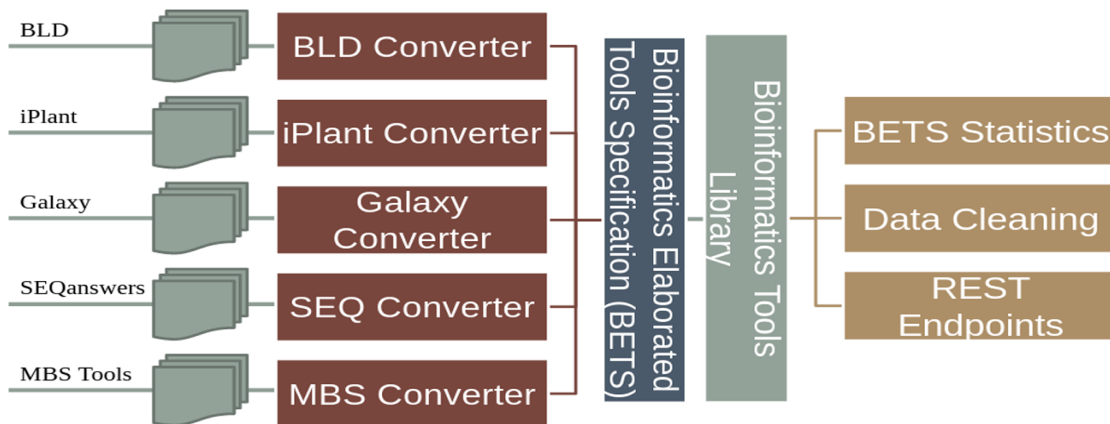

Figure S1b: BETS Converter workflow

## S2 - Resources extraction and semi-automatics curation

The **Bio-TDS** combines bioinformatics tools from five other repositories and stores them in one central location, following **BETS** (**B**ioinformatics **E**laborated **T**ool **S**pecification). There are six main modules that convert the data from each of the five repositories into BETS tools and store the new tools into the Bio-TDS database.

The **BETS Checker** is a Java application that tests the compatibility of a tool with the BETS specification. A tool is considered “compatible” if it is in the format specified by the specific BETS converter. For example, the system contains a mapper called **Galaxy Converter**. A tool from the Galaxy Tool Shed can only be “compatible” if it matches the predefined Galaxy format (Figure S2a0).

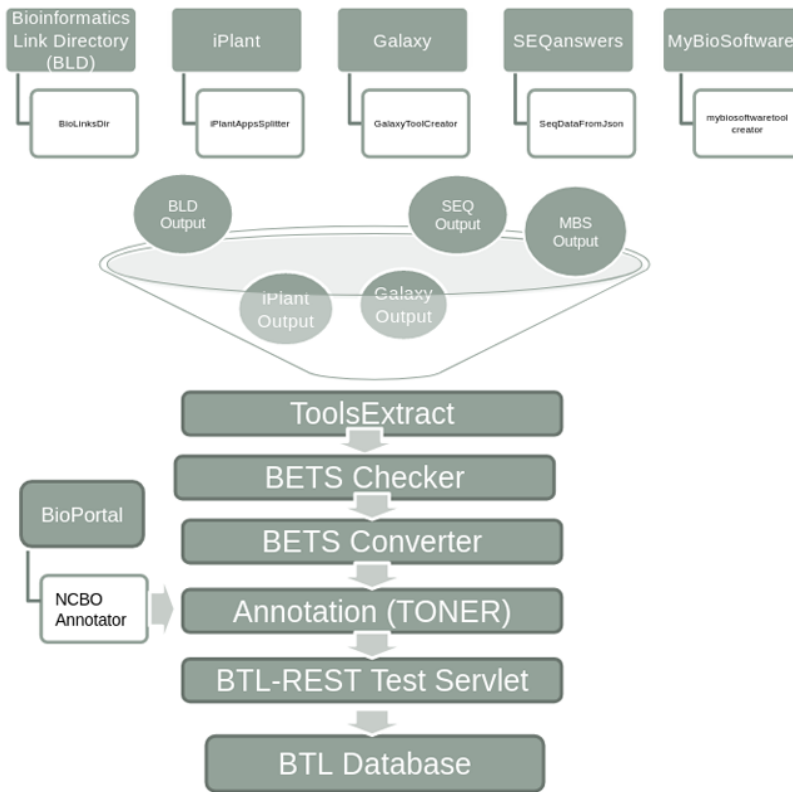

Figure S2a: Bio-TDS extraction workflow

A rule-based (*or predicate*) semi-automatic curation process has been developed for the Bio-TDS by combining human inspection and data mining methods. Rules are generated manually and are applied in a very specific order (Figure S2b). For example, some rules such as **[if tool type is 'not tool', then remove the tool from the repository]** are applied during the extraction process. If the scope of this rule is limited to one attribute, its consistency among repositories and impact on the curation process is relevant and effective. Following this logic, several categories were identified and used to lead the development of the rules: community/domain related rules, design related rules, and human intuitive rules (Table S2). After integration and curation, we have a very good improvement in our repository content.

## Curation workflow

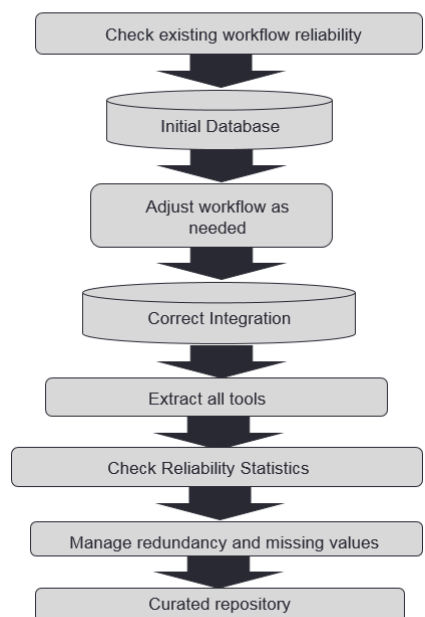

Figure S2b: Curation workflow

**Community or domain related rules**—are governed by information representation and information management in each community. For scientific communities such as bioinformatics, EDAM ontology is an important semantic and lexical information representation. These considerations led to the development of rules such as [if “input format” value is empty, and there is a mention in the “Description” in “list of input format from EDAM”, then fill the input format field with the mention]. Ontologies also allow us to check relationships between terms. Therefore, a relationship such as “synonym” from the ontology can help to populate some missing value or remove redundant data.

**Design based rules** include constraints related to data integration issues. The key goal is to keep the integrated database lossless when applying operations such as merging duplicates. For example, considering the following rule [if “Name” and “version” are the same for two tools then, merge them]. This definition of tool similarity allows for a simple string comparison of two attributes (name, version) using simple edit distance. During and after the integration of analytic tool definitions, missing data management rules are used to minimize the empty values in the Bio-TDS repository.

**Human inspection** remains the key and most accurate action during the curation process. This include rules for consistency checking (i.e. no contradiction, complete and close rules), data quality overview, and new intuitive rules generation (i.e. looking at data and statistics, some rules can be inferred, and human walkthrough suggestions. A simple Web UI was developed to allow contributors to add curation suggestions.

At the current development stage, the Bio-TDS team has already identified 10 key rules (Table S2).The application of that rule set has helped to improve the repository accuracy by removing duplicates and invalid tools (from 1J,€€€ tools to 1J,000), removing inaccurate attributes values, and filling in missing information. This has achieved an overall improvement rate of ~30%.

Table S2: Selected curation rules

| #  | Type** | Condition (if...)                                                                                              | Consequence (then...)                                                                                                                       | Notes /Scope                                                                                                                               |
|----|--------|----------------------------------------------------------------------------------------------------------------|---------------------------------------------------------------------------------------------------------------------------------------------|--------------------------------------------------------------------------------------------------------------------------------------------|
| 1  | HR     | Tool type not "Tool"                                                                                           | Remove the tool from the repository                                                                                                         | Extraction, Galaxy                                                                                                                         |
| 2  | DR     | "Version" contain string                                                                                       | Remove string and keep numeric                                                                                                              | BioQueryTool repository                                                                                                                    |
| 3  | DR     | "Name" and "version" are the same for 2 tools                                                                  | Merge them                                                                                                                                  | BioQueryTool repository                                                                                                                    |
| 4  | CR     | "input format" value is empty, and there is a mention in the "Description" in "list of input format from EDAM" | Fill the input format field with the mention                                                                                                | BioQueryTool repository                                                                                                                    |
| 5  | DR     | The tool source specification is compatible with BETS                                                          | Send to the SUCCESS folder for BETS converter and add to the repository. Otherwise, send to ERROR folder for manual integration.            | Extraction (ToolChecker), all integrated repositories                                                                                      |
| 6  | HR     | In many tools a given attribute value is empty                                                                 | Manually check and locate the most relevant related field to populate them.                                                                 | Extraction, BioQueryTool repository (e.g. when platform is "R Bioconductor", "Operating System" attribute is filled)                       |
| 7  | DR     | A tool attribute contain 2 or more duplicate                                                                   | Remove duplicate                                                                                                                            | Extraction, all repositories                                                                                                               |
| 8  | CR     | The tools annotation is weak (<5 annotation terms)                                                             | Use the ontology context (hierarchy parent-child, synonyms, preferred name) to enrich the a notation                                        | TONER, BioQueryTool repository                                                                                                             |
| 9  | HR     | A given attribute value is empty                                                                               | Use homolog attribute to populate the attribute value                                                                                       | BioQueryTool repository<br>e.g. if there is no "link" or "author" for a given tool, Use "reference URL" or "contact" to populate the field |
| 10 | HR     | A tool doesn't have a quality attribute                                                                        | Check if there is similar(name, reference, ...) tool from SEQAnswer or GALAXY, and use the related quality attribute (citation count, ...). | BioQueryTool repository                                                                                                                    |

\*\*Rules Type: CR= Community Rules; DR= Design Rules ; HR= Human intuitive Rules

### S3 - TONER: Tools ontology-based annotation

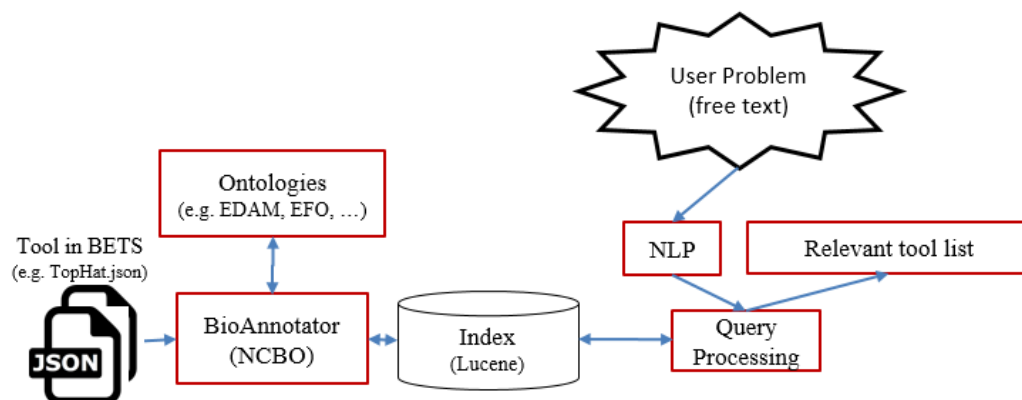

Figure S3: TONER workflow

# S4- Bio-TDS Query processing workflow and programmatic access

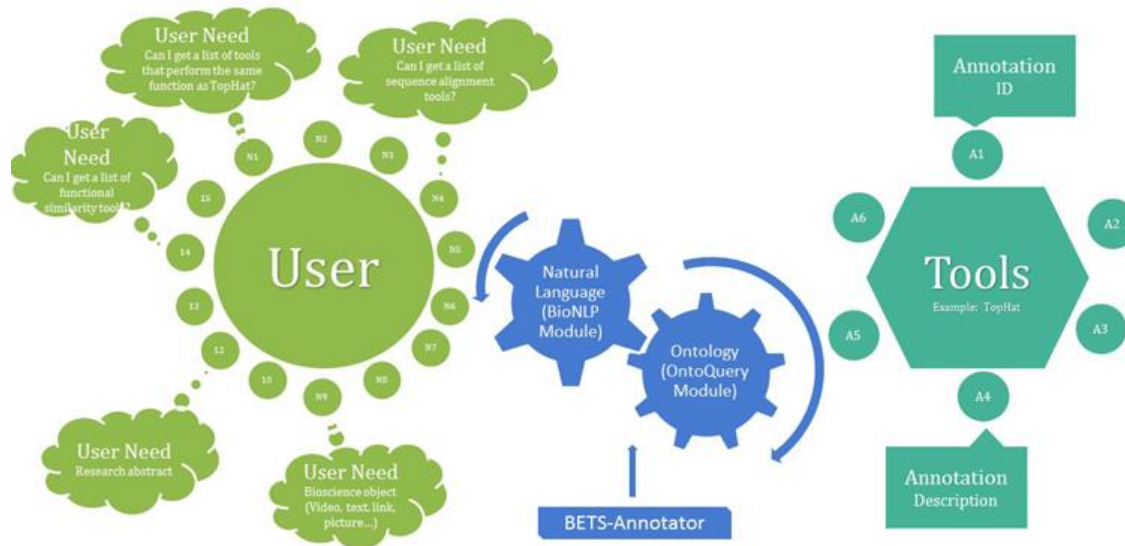

Figure S4a: Bio-TDS System Workflow

The screenshot displays the BioQuery Tool Library interface with several annotated view options:

- 1. Query:** The search bar at the top where users can enter queries like "RNA Sequence", "Multiple Sequence Alignment", and "Multiple Protein Sequence Alignment".
- 2. Browse:** A sidebar menu titled "Browse By Method" listing categories such as Alignment, Alignment Analysis, Genome Alignment, Local Sequence Alignment, Multiple Sequence Alignment, Multiple Protein Sequence Alignment, Pairwise Sequence Alignment, Pairwise Structure Alignment, Protein Alignment, RNA-Seq Alignment, Secondary Structure Alignment, Sequence Alignment, Structure Alignment, and Annotation.
- 3. List view:** A list of tool names and brief descriptions, including *kalign*, *espritz*, *fasd-somatic*, *gramcluster*, *heura*, *fac*, *skewer*, *rolexa*, and *micrury lna microrna array analysis software*.
- 4. Table view:** A table view showing tool names and links, such as *zpicture and multi-zpicture*, *zorro*, *zoom*, *zmp*, *zinc finger tools*, *zimba*, and *zift*.
- 5. Details:** A detailed view for the tool "tophat" (ID: 569), showing its description, author (Cole Trapnell), and a summary: "A fast splice junction mapper for RNA-Seq reads to mammalian-sized genomes." It also includes sections for "Inputs" and "Parameters", both showing "No records found".
- 6. Tool BETS:** A window displaying the Bio-Entity Tool System (BETS) JSON output for the tool, including fields for "summary", "technology", "author", "algorithm", "contact", and "uri".

Figure S4b: Bio-TDS Display View Options

Table S4: REST Endpoints (Base URL <http://jacksons.usd.edu/BTL-REST>)

| URL                                                    | HTTP VERB | RETURNS                                                       |
|--------------------------------------------------------|-----------|---------------------------------------------------------------|
| Tools                                                  |           |                                                               |
| /resources/tools/                                      | GET       | Disabled - Get ranges instead - List of All Tools             |
| /resources/tools/{id}                                  | GET       | Tool by ID                                                    |
| /resources/tools/{from}/{to}                           | GET       | Tools within a range                                          |
| /resources/tools/count                                 | GET       | Count of All Tools                                            |
| /resources/tools/names                                 | GET       | All Tool Names                                                |
| /resources/tools/summaries                             | GET       | All Tool Summaries                                            |
| BETS                                                   |           |                                                               |
| /resources/bets/                                       | GET       | Disabled - Get individual bets - All BETS data for each tools |
| /resources/bets/{id}                                   | GET       | BETS for tool by ID                                           |
| /resources/bets/inputs/{id}                            | GET       | Inputs for Tool by ID                                         |
| Bridges                                                |           |                                                               |
| /resources/bridges/                                    | GET       | All Bridges data                                              |
| /resources/bridges/{id}                                | GET       | Bridge by ID                                                  |
| /resources/bets/{from}/{to}                            | GET       | Bridges within a range                                        |
| /resources/bets/count                                  | GET       | Count of the Bridges                                          |
| Repositories                                           |           |                                                               |
| /resources/repos/                                      | GET       | List of the Repositories our tools came from                  |
| /resources/repos/tools                                 | GET       | List of Every Tool ID and its Repo ID                         |
| /resources/repos/tools/{id}                            | GET       | ResourceTool by ID                                            |
| /resources/repos/getbytoolids                          | GET       | Get example JSON for posting                                  |
| /resources/repos/getbytoolids                          | POST      | Post an array of tool ids to get their repository names       |
| Storing Bridges or Tools (these are normally disabled) |           |                                                               |
| /resources/store-bridges                               | GET       | An example Bridge JSON to POST                                |
| /resources/store-bridges                               | POST      | Returns the URI of the created bridge                         |
| /resources/store-bridges/list                          | POST      | Disabled                                                      |
| /resources/store-bridges/{id}                          | POST      | Accepted if it updates the bridge id specified                |
| /resources/store-tools                                 | GET       | Returns an example Tool JSON to Post                          |
| /resources/store-tools                                 | POST      | Disabled                                                      |
| /resources/store-tools/list                            | POST      | Disabled                                                      |
| /resources/store-tools/{id}                            | POST      | Accepted if it updates the tool id specified                  |

\*Subject to change

\*Query parameter 'PrettyPrint=true' will return prettified JSON



## S5 - Bio-TDS Evaluation and comparison

**⚠️ Note:** The data used for the current tests have been collected from the associated repositories in December 2015. Because each repository may have been updated, the reproducibility should consider repository versions for accuracy.

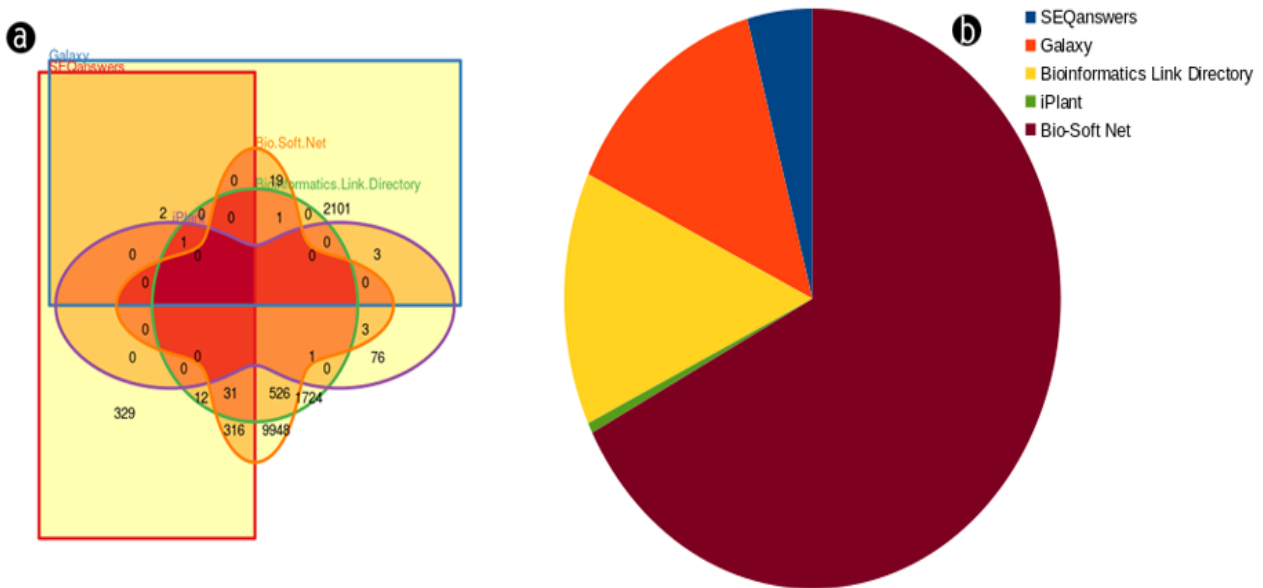

**c**

| Criteria*         | Bio-TDS | BLD    | ELIXIR | GALAXY | SeqAnswer |
|-------------------|---------|--------|--------|--------|-----------|
| MRR <sup>+</sup>  | 1       | 0.0131 | 0.0087 | 0.0043 | 0.1484    |
| MAP <sup>+</sup>  | 0.0004  | NS     | NS     | NS     | NS        |
| MAR <sup>+</sup>  | 0.8755  | 0      | 0      | 0.0036 | 0.0339    |
| MAF <sup>+</sup>  | 0.0008  | NS     | NS     | NS     | NS        |
| MRR <sup>++</sup> | 0.7598  | NS     | 0.1441 | 0.131  | 0.6899    |
| MAP <sup>++</sup> | 0.0427  | NS     | NS     | NS     | 0.0572    |
| MAR <sup>++</sup> | 0.3474  | 0.02   | 0.0696 | 0.0518 | 0.2327    |
| MAF <sup>++</sup> | 0.0801  | NS     | NS     | NS     | 0.1383    |

\*Evaluation Criteria: MRR = Mean Retrieval Rate; MAP = Mean Average Precision; MAR = recall; MAF = mean Average F-measure. NS = not significant result. User Query Type: \*Free text Query; \*\*Keyword Query

Figure S5a: Bio-TDS Evaluation and Comparison Overview

Figure S5a shows the existing repository statistic (b), as of May 2016, the tools count overlap Venn diagram (a), and repositories comparison overview (c).

**⚠️ Note:** "NS" value in a given evaluation criteria (Precision, Recall,...) indicates limited data point (missing >40% data points compare the variable dataset size) to compute an accurate meaningful criteria value. This is due to a low retrieval rate in the related repository (e.g. no result return for the query).

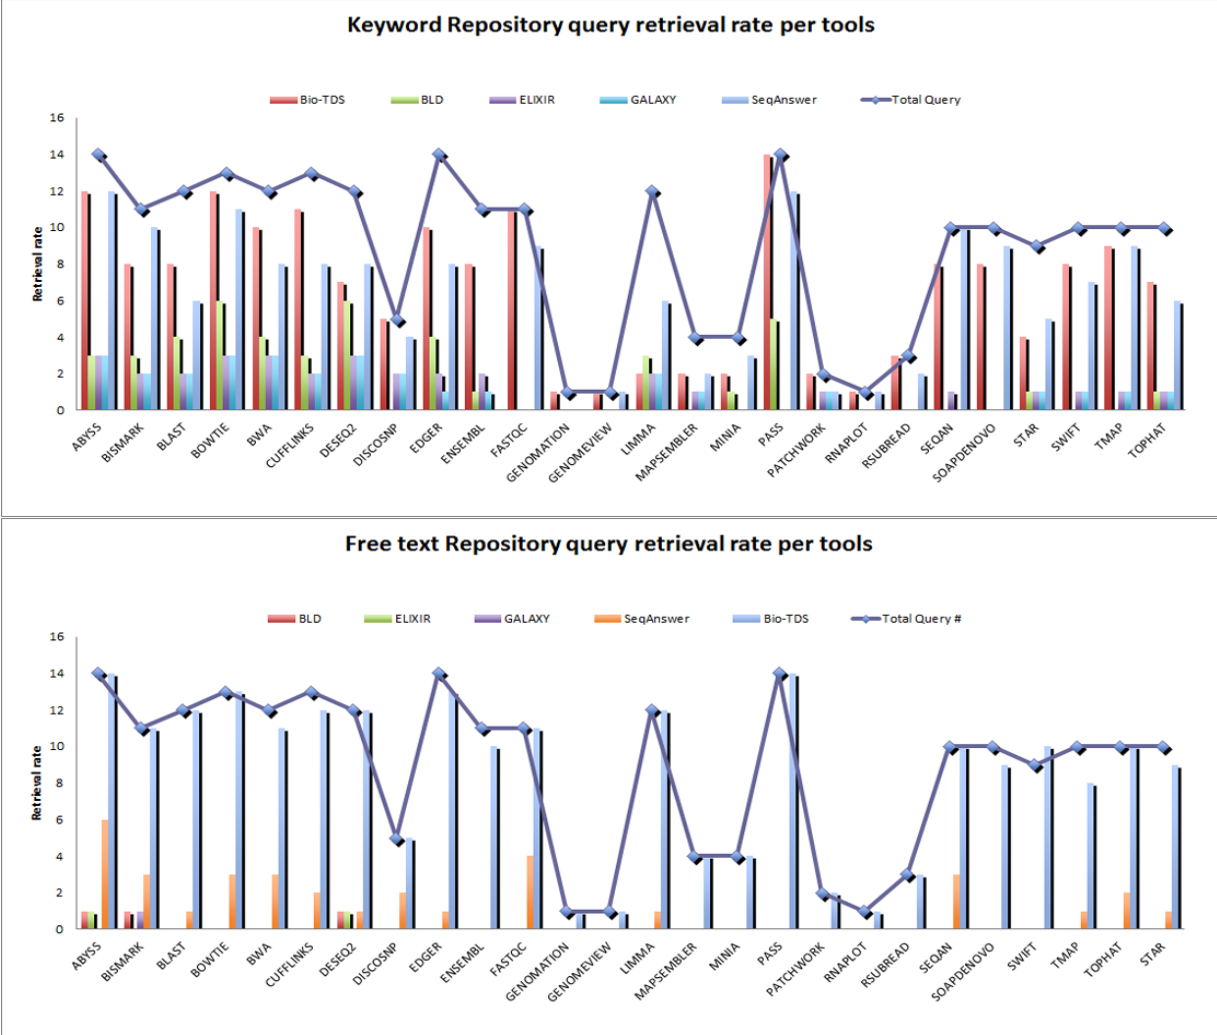

Figure S5b: Bio-TDS Retrieval Rate Comparison

Free text Search

| Average Precision      |           |           |            |            |                |
|------------------------|-----------|-----------|------------|------------|----------------|
| Tools                  | BLD       | ELIXIR    | GALAXY     | SeqAnswer  | Bio-TDS        |
| ABYSS                  | 0         | 0         | 0          | 0.16666667 | 0.00046366     |
| BISMAR                 | 0         | NAN       | 0.33333333 | 0.35416667 | 0.00042202     |
| BLAST                  | NAN       | NAN       | NAN        | 1          | 0.00028972     |
| BOWTIE                 | NAN       | NAN       | NAN        | 0.13888889 | 0.00022822     |
| BWA                    | NAN       | NAN       | NAN        | 0.03125    | 0.00020083     |
| CUFFLINKS              | NAN       | NAN       | NAN        | 0          | 0.00062173     |
| DESEQ2                 | 0         | 0         | 0          | 0.07692308 | 0.0002073      |
| DISCOSNP               | NAN       | NAN       | NAN        | 0          | 0.00312451     |
| EDGER                  | NAN       | NAN       | NAN        | 0          | 0.00029053     |
| ENSEMBL                | NAN       | NAN       | NAN        | 0          | 0.00020974     |
| FASTQC                 | NAN       | NAN       | NAN        | 0.01190476 | 0.00025419     |
| GENOMATIO              | NAN       | NAN       | NAN        | NAN        | 0              |
| GENOMEVIE              | NAN       | NAN       | NAN        | NAN        | 0.0002         |
| LIMMA                  | NAN       | NAN       | NAN        | 0          | 0.00018105     |
| MAPSEMBLE              | NAN       | NAN       | NAN        | 0          | 0.00038832     |
| MINIA                  | NAN       | NAN       | NAN        | NAN        | 0.00033301     |
| PASS                   | NAN       | NAN       | NAN        | NAN        | 0.00010874     |
| PATCHWORK              | NAN       | NAN       | NAN        | NAN        | 0.0002         |
| RNAPLOT                | NAN       | NAN       | NAN        | NAN        | 0.00013333     |
| RSUBREAD               | NAN       | NAN       | NAN        | 0          | 0.0002         |
| SEQAN                  | NAN       | NAN       | NAN        | 0          | 0.00024327     |
| SOAPDENOV              | NAN       | NAN       | NAN        | 0          | 0.00011854     |
| SWIFT                  | 0         | NAN       | NAN        | NAN        | 0.00014566     |
| TMAP                   | NAN       | NAN       | NAN        | 0.01190476 | 0.00024761     |
| TOPHAT                 | NAN       | NAN       | NAN        | 0          | 0.00024549     |
| STAR                   | NAN       | NAN       | NAN        | 0.00444444 | 0.00037        |
| <b>MAP<sup>+</sup></b> | <b>NS</b> | <b>NS</b> | <b>NS</b>  | <b>NS</b>  | <b>0.00037</b> |

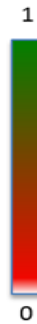

Keyword Search

| Row Labels | Bio-TDS          | BLD         | ELIXIR      | GALAXY      | SeqAnswer        |
|------------|------------------|-------------|-------------|-------------|------------------|
| ABYSS      | 0.01492037       | 0           | 0           | 0.000179598 | 0.021416112      |
| BISMAR     | 0.03036063       | 0           | 0.006578947 | 0           | 0.195876563      |
| BLAST      | 0.00293502       | 0.000282486 | 0.000843882 | 0           | 0.013644375      |
| BOWTIE     | 0.00538879       | 0.002083333 | 0.042644184 | 0.017419355 | 0.280136421      |
| BWA        | 0.01120088       | 0.006388889 | 0.011478844 | 0.014492754 | 0.020087876      |
| CUFFLINKS  | 0.0009787        | 0           | 0           | 0.023255814 | 0.006977843      |
| DESEQ2     | 0.00162644       | 0           | 0.008779135 | 0.002754821 | 0.045080942      |
| DISCOSNP   | 0.4006079        | NAN         | 1           | 0.333333333 | 0.375            |
| EDGER      | 0.00192814       | 0           | 0.012820513 | 0           | 0.020597678      |
| ENSEMBL    | 0.00083839       | 0.000374251 | 0.008928571 | 0           | 0                |
| FASTQC     | 0.05493548       | NAN         | NAN         | NAN         | 0.006201734      |
| GENOMATIO  | 0                | NAN         | NAN         | NAN         | NAN              |
| GENOMEVIE  | 0                | NAN         | NAN         | NAN         | 0                |
| LIMMA      | 0.00102943       | 0           | 0           | 0.01        | 0                |
| MAPSEMBLE  | 0.0023072        | 0           | 0.027027027 | 0.055555556 | 0.009287489      |
| MINIA      | 0.5              | 0           | 0           | 0           | 0.333333333      |
| PASS       | 0.00020121       | 0           | 0           | 0           | 0.004807692      |
| PATCHWORK  | 0.0001           | 0           | 0           | 0           | 0                |
| RNAPLOT    | 0                | 0           | 0           | 0           | 0                |
| RSUBREAD   | 0                | 0           | 0           | 0           | 0                |
| SEQAN      | 0.0033214        | NAN         | 0           | 0           | 0.014544782      |
| SOAPDENOV  | 0                | 0           | 0           | 0           | 0                |
| STARS      | 0                | 0           | 0           | 0           | 0.009581882      |
| SWIFT      | 0                | 0           | 0           | 0           | 0                |
| TMAP       | 0.0116857        | 0           | 0           | 0           | 0.005291005      |
| TOPHAT     | 0.02421893       | 0           | 0.025641026 | 0.023255814 | 0.068760838      |
| <b>MAP</b> | <b>0.0427438</b> | <b>NS</b>   | <b>NS</b>   | <b>NS</b>   | <b>0.0572251</b> |

| Average Recall         |          |          |                |                |                |
|------------------------|----------|----------|----------------|----------------|----------------|
| Tools                  | BLD      | ELIXIR   | GALAXY         | SeqAnswer      | Bio-TDS        |
| ABYSS                  | 0        | 0        | 0              | 0.07142857     | 1              |
| BISMAR                 | 0        | 0        | 0.09090909     | 0.18181818     | 0.90909091     |
| BLAST                  | 0        | 0        | 0              | 0.08333333     | 1              |
| BOWTIE                 | 0        | 0        | 0              | 0.15384615     | 0.92307692     |
| BWA                    | 0        | 0        | 0              | 0.08333333     | 1              |
| CUFFLINKS              | 0        | 0        | 0              | 0              | 1              |
| DESEQ2                 | 0        | 0        | 0              | 0.08333333     | 1              |
| DISCOSNP               | 0        | 0        | 0              | 0              | 0.8            |
| EDGER                  | 0        | 0        | 0              | 0              | 1              |
| ENSEMBL                | 0        | 0        | 0              | 0              | 1              |
| FASTQC                 | 0        | 0        | 0              | 0.09090909     | 1              |
| GENOMATIO              | 0        | 0        | 0              | 0              | 0              |
| GENOMEVIE              | 0        | 0        | 0              | 0              | 1              |
| LIMMA                  | 0        | 0        | 0              | 0              | 0.83333333     |
| MAPSEMBLE              | 0        | 0        | 0              | 0              | 1              |
| MINIA                  | 0        | 0        | 0              | 0              | 1              |
| PASS                   | 0        | 0        | 0              | 0              | 1              |
| PATCHWORK              | 0        | 0        | 0              | 0              | 0.5            |
| RNAPLOT                | 0        | 0        | 0              | 0              | 1              |
| RSUBREAD               | 0        | 0        | 0              | 0              | 0.66666667     |
| SEQAN                  | 0        | 0        | 0              | 0              | 1              |
| SOAPDENOV              | 0        | 0        | 0              | 0              | 1              |
| SWIFT                  | 0        | 0        | 0              | 0              | 0.55555556     |
| TMAP                   | 0        | 0        | 0              | 0.1            | 0.7            |
| TOPHAT                 | 0        | 0        | 0              | 0              | 1              |
| STAR                   | 0        | 0        | 0              | 0.11111111     | 1              |
| <b>MAR<sup>+</sup></b> | <b>0</b> | <b>0</b> | <b>0.00364</b> | <b>0.03392</b> | <b>0.87551</b> |

| Row Labels | Bio-TDS            | BLD              | ELIXIR          | GALAXY           | SeqAnswer        |
|------------|--------------------|------------------|-----------------|------------------|------------------|
| ABYSS      | 0.5                | 0                | 0               | 0.071428571      | 0.214285714      |
| BISMAR     | 0.545454545        | 0                | 0.090909091     | 0                | 0.545454545      |
| BLAST      | 0.416666667        | 0.083333333      | 0.083333333     | 0                | 0.166666667      |
| BOWTIE     | 0.538461538        | 0.076923077      | 0.153846154     | 0.153846154      | 0.538461538      |
| BWA        | 0.5                | 0.25             | 0.25            | 0.083333333      | 0.416666667      |
| CUFFLINKS  | 0.384615385        | 0                | 0               | 0.153846154      | 0.307692308      |
| DESEQ2     | 0.416666667        | 0                | 0.166666667     | 0.083333333      | 0.583333333      |
| DISCOSNP   | 1                  | 0                | 0.4             | 0.4              | 0.6              |
| EDGER      | 0.428571429        | 0                | 0.071428571     | 0                | 0.428571429      |
| ENSEMBL    | 0.363636364        | 0.090909091      | 0.090909091     | 0                | 0                |
| FASTQC     | 0.454545455        | 0                | 0               | 0                | 0.272727273      |
| GENOMATIO  | 0                  | 0                | 0               | 0                | 0                |
| GENOMEVIE  | 0                  | 0                | 0               | 0                | 0                |
| LIMMA      | 0.166666667        | 0                | 0.083333333     | 0                | 0                |
| MAPSEMBLE  | 0.5                | 0                | 0.25            | 0.25             | 0.5              |
| MINIA      | 0.25               | 0                | 0               | 0                | 0.25             |
| PASS       | 0.071428571        | 0                | 0               | 0                | 0.071428571      |
| PATCHWORK  | 0.5                | 0                | 0               | 0                | 0                |
| RNAPLOT    | 0                  | 0                | 0               | 0                | 0                |
| RSUBREAD   | 0                  | 0                | 0               | 0                | 0                |
| SEQAN      | 0.4                | 0                | 0               | 0                | 0.3              |
| SOAPDENOV  | 0                  | 0                | 0               | 0                | 0                |
| STARS      | 0                  | 0                | 0               | 0                | 0.222222222      |
| SWIFT      | 0                  | 0                | 0               | 0                | 0                |
| TMAP       | 0.5                | 0                | 0               | 0                | 0.1              |
| TOPHAT     | 0.5                | 0                | 0.1             | 0.1              | 0.3              |
| <b>MAR</b> | <b>0.337468531</b> | <b>0.0200466</b> | <b>0.069617</b> | <b>0.0518315</b> | <b>0.2327004</b> |

| Average F-Measure      |           |           |           |            |                |
|------------------------|-----------|-----------|-----------|------------|----------------|
| Tools                  | BLD       | ELIXIR    | GALAXY    | SeqAnswer  | Bio-TDS        |
| ABYSS                  | NAN       | NAN       | NAN       | 1          | 0.00092593     |
| BISMAR                 | NAN       | NAN       | 0.5       | 0.55882353 | 0.00092704     |
| BLAST                  | NAN       | NAN       | NAN       | 1          | 0.00057917     |
| BOWTIE                 | NAN       | NAN       | NAN       | 0.32692308 | 0.00049433     |
| BWA                    | NAN       | NAN       | NAN       | 0.22222222 | 0.00040159     |
| CUFFLINKS              | NAN       | NAN       | NAN       | NAN        | 0.00123894     |
| DESEQ2                 | NAN       | NAN       | NAN       | 0.14285714 | 0.00041451     |
| DISCOSNP               | NAN       | NAN       | NAN       | NAN        | 0.00771103     |
| EDGER                  | NAN       | NAN       | NAN       | NAN        | 0.00058079     |
| ENSEMBL                | NAN       | NAN       | NAN       | NAN        | 0.00041939     |
| FASTQC                 | NAN       | NAN       | NAN       | 0.09090909 | 0.00050822     |
| GENOMATIO              | NAN       | NAN       | NAN       | NAN        | NAN            |
| GENOMEVIE              | NAN       | NAN       | NAN       | NAN        | 0.00039992     |
| LIMMA                  | NAN       | NAN       | NAN       | NAN        | 0.00043443     |
| MAPSEMBLE              | NAN       | NAN       | NAN       | NAN        | 0.00077613     |
| MINIA                  | NAN       | NAN       | NAN       | NAN        | 0.0004357      |
| PASS                   | NAN       | NAN       | NAN       | NAN        | 0.0006656      |
| PATCHWORK              | NAN       | NAN       | NAN       | NAN        | 0.00043488     |
| RNAPLOT                | NAN       | NAN       | NAN       | NAN        | 0.00039992     |
| RSUBREAD               | NAN       | NAN       | NAN       | NAN        | 0.00039992     |
| SEQAN                  | NAN       | NAN       | NAN       | NAN        | 0.00039992     |
| SOAPDENOV              | NAN       | NAN       | NAN       | NAN        | 0.00048641     |
| STARS                  | NAN       | NAN       | NAN       | NAN        | 0.00042664     |
| SWIFT                  | NAN       | NAN       | NAN       | 0.09090909 | 0.00041609     |
| TMAP                   | NAN       | NAN       | NAN       | NAN        | 0.00049506     |
| TOPHAT                 | NAN       | NAN       | NAN       | 0.04347826 | 0.00049082     |
| <b>MAF<sup>+</sup></b> | <b>NS</b> | <b>NS</b> | <b>NS</b> | <b>NS</b>  | <b>0.00081</b> |

| Row Labels | Bio-TDS          | BLD         | ELIXIR      | GALAXY      | SeqAnswer       |
|------------|------------------|-------------|-------------|-------------|-----------------|
| ABYSS      | 0.04588941       | NAN         | NAN         | 0.001077006 | 0.13797932      |
| BISMAR     | 0.07349648       | NAN         | 0.025974026 | NAN         | 0.353308498     |
| BLAST      | 0.00931053       | 0.00169348  | 0.001686341 | NAN         | 0.064052795     |
| BOWTIE     | 0.01777138       | 0.024691358 | 0.114035088 | 0.050857843 | 0.45112736      |
| BWA        | 0.03475082       | 0.01676534  | 0.022417154 | 0.083333333 | 0.05844026      |
| CUFFLINKS  | 0.00429234       | NAN         | NAN         | 0.045454545 | 0.027318296     |
| DESEQ2     | 0.00453316       | NAN         | 0.025695894 | 0.016393443 | 0.087979774     |
| DISCOSNP   | 0.50121212       | NAN         | 1           | 0.5         | 0.6             |
| EDGER      | 0.00638953       | NAN         | 0.05        | NAN         | 0.051905201     |
| ENSEMBL    | 0.00334565       | 0.002989537 | 0.035087719 | NAN         | NAN             |
| FASTQC     | 0.17140873       | NAN         | NAN         | NAN         | 0.036228243     |
| GENOMATIO  | NAN              | NAN         | NAN         | NAN         | NAN             |
| GENOMEVIE  | NAN              | NAN         | NAN         | NAN         | NAN             |
| LIMMA      | 0.00205558       | NAN         | 0.039215686 | NAN         | NAN             |
| MAPSEMBLE  | 0.00460181       | NAN         | 0.052631579 | 0.105263158 | 0.027269731     |
| MINIA      | 1                | NAN         | NAN         | NAN         | 1               |
| PASS       | 0.00561798       | NAN         | NAN         | NAN         | 0.117647059     |
| PATCHWORK  | 0.00039992       | NAN         | NAN         | NAN         | NAN             |
| RNAPLOT    | NAN              | NAN         | NAN         | NAN         | NAN             |
| RSUBREAD   | NAN              | NAN         | NAN         | NAN         | NAN             |
| SEQAN      | 0.01321008       | NAN         | NAN         | NAN         | 0.090611542     |
| SOAPDENOV  | NAN              | NAN         | NAN         | NAN         | NAN             |
| STARS      | NAN              | NAN         | NAN         | NAN         | 0.046530951     |
| SWIFT      | NAN              | NAN         | NAN         | NAN         | NAN             |
| TMAP       | 0.0399669        | NAN         | NAN         | NAN         | 0.090909091     |
| TOPHAT     | 0.06362066       | NAN         | 0.05        | 0.045454545 | 0.217037037     |
| <b>MAF</b> | <b>0.0800749</b> | <b>NS</b>   | <b>NS</b>   | <b>NS</b>   | <b>0.138334</b> |

Figure S5c: Bio-TDS exactness (Precision) and completeness (Recall) Comparison.
